# Supplementary material for: Antifungal profile and mechanism of bioinspired nanoscale magnesium against the agriculturally important pathogen Fusarium oxysporum f. sp. niveum
Source: Royal Society of Chemistry journal article supplement (doi:10.1039/d4en00548a), 2024-01-01
Supplement: d4en00548a1.pdf [file d4en00548a1.pdf]

## *Supplementary Information*

### **Antifungal profile and mechanism of bioinspired nanoscale magnesium against the agriculturally important pathogen *Fusarium oxysporum* f. sp. *niveum***

Muhammad Noman<sup>a</sup>, Temoor Ahmed<sup>b,c,d,e</sup>, Mohammad Shafiqul Islam<sup>a,c</sup>, Mudassar Ahmad<sup>f</sup>, Jing Wang<sup>a</sup>, Yingying Cai<sup>a</sup>, Zhongna Hao<sup>a</sup>, Hayssam M. Ali<sup>g</sup>, Zhen Zhang<sup>a</sup>, Yanli Wang<sup>a</sup>, Bin Li<sup>c</sup> and Jiaoyu Wang<sup>a\*</sup>

<sup>a</sup>State Key Laboratory for Managing Biotic and Chemical Treats to the Quality and Safety of Agro-Products, Institute of Plant Protection and Microbiology, Zhejiang Academy of Agricultural Sciences, Hangzhou 310021, China

<sup>b</sup>Xianghu Laboratory, Hangzhou 311231, China

<sup>c</sup>Institute of Biotechnology, Zhejiang University, Hangzhou 310058, China

<sup>d</sup>Department of Life Sciences, Western Caspian University, Baku, Azerbaijan

<sup>e</sup>MEU Research Unit, Middle East University, Amman, Jordan

<sup>f</sup>Fruit Tree Research Institute, Guangdong Academy of Agricultural Sciences, Guangzhou 510640, China

<sup>g</sup>Department of Botany and Microbiology, College of Science, King Saud University, Riyadh 11451, Saudi Arabia

#### **\*Correspondence:**

Dr. Jiaoyu Wang (**Professor**)

Email: wangjiaoyu78@sina.com; wangjy@zaas.ac.cn

**Table S1.** Primers used for bacterial identification and RT-qPCR analysis.

| <b>Genes</b>                    | <b>Accession No.</b> | <b>Names</b>  | <b>Sequence (5'-3')</b>     |
|---------------------------------|----------------------|---------------|-----------------------------|
| <b>Bacterial identification</b> |                      |               |                             |
| <i>16S rRNA</i>                 |                      | fD1           | AGAGTTTGATCCTGGCTCAG        |
|                                 |                      | rD1           | AAGGAGGTGATCCAGCC           |
| <i>rpoB</i>                     |                      | rpoB-F        | GGYTWYGAAGTNCGHGACGTDCA     |
|                                 |                      | rpoB-R        | TGACGYTGTCATGTTBGMRCCCATMA  |
| <b>RT-qPCR</b>                  |                      |               |                             |
| <i>FonOpm12</i>                 | EU603504             | FonOpm12-RT-F | CGATTAGCGAAGACATTCACAAGACT  |
|                                 |                      | FonOpm12-RT-R | ACGGTCAAGAAGATGCAGGGTAAAGGT |
| <i>ClRps10</i>                  | HM036339             | ClRps10-RT-F  | AGGCTCACCTAAAAGAAGG         |
|                                 |                      | ClRps10-RT-R  | GGTCAACACAAGGATCTTACT       |
| <i>FonPEX2</i>                  | FOXG_01054           | FonPEX2-RT-F  | CATACGGAGCGGCTCTCCAA        |
|                                 |                      | FonPEX2-RT-R  | GCCAGTCCTCCCATCTCGTC        |
| <i>FonPEX8</i>                  | FOXG_02249           | FonPEX8-RT-F  | TTCCGACCTTCGAGGATGC         |
|                                 |                      | FonPEX8-RT-R  | AGCGTCGCATGCATCAGTTG        |
| <i>FonPEX10</i>                 | FOXG_01730           | FonPEX10-RT-F | TGGAGAGCCTTCGCAAACGA        |
|                                 |                      | FonPEX10-RT-R | AAGACGGCCGACCCAATCTC        |
| <i>FonActin</i>                 | FOXG_01569           | FonActin-RT-F | GAGGGACCGCTCTCGTCGT         |
|                                 |                      | FonActin-RT-R | GGAGATCCAGACTGCCGCTCAG      |

**Table S2.** Isolates and their minimum inhibitory concentration (MIC) for MgSO<sub>4</sub>.

| <b>Sr. #</b> | <b>Isolates</b> | <b>MIC values</b> |
|--------------|-----------------|-------------------|
| 1            | NOT-1           | 0.65 M            |
| 2            | NOT-2           | 0.80 M            |
| 3            | NOT-3           | 0.80 M            |
| 4            | NOT-4           | 1.25 M            |
| 5            | NOT-5           | 0.50 M            |
| 6            | NOT-6           | 0.50 M            |
| 7            | NOT-7           | 0.50 M            |
| 8            | NOT-8           | 1.0 M             |
| 9            | NOT-9           | 0.50 M            |
| 10           | NOT-10          | 1.40 M            |
| 11           | NOT-11          | 1.25 M            |
| 12           | NOT-12          | 0.80 M            |
| 13           | NOT-13          | 0.50 M            |
| 14           | NOT-14          | 0.50 M            |
| 15           | NOT-15          | 0.50 M            |
| 16           | NOT-16          | 0.50 M            |
